# Supplementary material
Source: Springer Nature journal article supplement (https://www.springerprofessional.de/resource/supplementary/13638_2014_1022_MOESM5_ESM.pdf/11899068)
Supplement: MOESM5 [file 11899068]

ENHANCED UTILIZATION OF GENERATION ASSETS.

DEFERRAL OF SYSTEM UPGRADES.

BENEFITS OF EV DEMAND MANAGEMENT.

REDUCED ELECTRICITY PRICES.

REDUCED GHG EMISSIONS.
